# Supplementary material for: Surface Chemistry Provoked Strategy to Develop Sustainable Latent Fingerprints Visualization and Multiple Anti-Counterfeiting Trajectory: Aggregation-Induced Emission Mechanism Based Active Conjugated Imidazole Luminogens
Source: Research Square preprint supplement (doi:10.21203/rs.3.rs-441794/v1), 2021-05-10
Supplement: Supplementary file 1 [file 8050bbf6b0b79863077df6e6.docx]

**Additional Information**

**Surface Chemistry Provoked Strategy to Develop Sustainable Latent Fingerprints Visualization and Multiple Anti-counterfeiting Trajectory: Aggregation-Induced Emission Mechanism based Active Conjugated Imidazole Luminogens**

**M.K. Ravindra1, G.P. Darshan2, D.R. Lavanya3, K.M. Mahadevan1, H.B. Premkumar2, S.C. Sharma4,5,6, H. Adarsha7, H. Nagabhushana3, ***

*1Department of Chemistry, Kuvempu University, P. G. Centre, Kadur 577 548, India*

*2Department of Physics, FMPS, MS Ramaiah University of Applied Sciences, Bengaluru 560 054, India*

*3Prof. C.N.R. Rao Centre for Advanced Materials, Tumkur University,*

*Tumkur 572 103, India*

*4National Assessment and Accreditation Council, Bengaluru 560 072, India*

*5Honarory Professor, Jain University, Bengaluru 562 112, India*

*6Distinguished Professor, Centre for Energy, Indian lnstitute of Technology, Guwahati 781 039, India*

*7Department of Mechanical Engineering, Faculty of Engineering and Technology, Jain Global Campus, Bengaluru 562 112, India*

Figure S1. FTIR spectrum of the FDIP molecule.

Figure S2. 1H NMR spectrum of the prepared FDIP molecule.

Figure S3. Mass spectrum of FDIP molecule.

Figure S4. Grayscale images of LFPs developed with using FDIP solution on the glass surface; (a-g) developed FPs was examined upon high intensity UV 365 nm illumination; (h-k) FPs maintained at different temperatures for 30 min; (l-n) FPs developed under various weather as well as time durations (Scale bar: 5 mm). The grayscale images are corresponding to the RGB true color images of Figure 5. Gray value: 0-255.

Figure S5. Grayscale FPs images on non-porous, porous and semi-porous substrates developed by spraying with FDIP solution (Scale bar: 5 mm). The grayscale images are corresponding to the RGB true color images of Figure 6 (a-l). Gray value: 0-255.

Figure S6. Grayscale images of FPs after developing with FDIP solution treated with successive physical abrasion (Scale bar: 5 mm). The grayscale images are corresponding to the RGB true color images of Figure 7 (a-h). Gray value: 0-255.

Figure S7. Grayscale images of high resolution FP image along with extracted ridge features including level I, level II and level III (1-16) on the glass surface visualized by FDIP solution (Scale bar: 5 mm). The grayscale images are corresponding to the RGB true color images of Figure 8 (a). Gray value: 0-255.

Table S1. The reported AIE based materials used for visualization of LFPs.

| **Compounds** | **λemi**  **(nm)** | **Light irradiation**  **(nm)** | **Conc.** | **Solvent combination** | **Water fraction** | **References** |
| --- | --- | --- | --- | --- | --- | --- |
| Tetraphenylethene-based Dye (**FLA-1)** | 470 | 365 | 0.25 mM | CH3CN/H2O | 60 %,  70 % | [41] |
| 9-(4-(ter-butyldiphenylsilyloxy)phenyl)3,3,6,6,10-pentamethyl-3,4,6,7- tetrahydroacridine1,8(*2H,5H,9H,10H*)-dione) **(ADDSi)** | 440 | 365 | 0.3 mM | THF/H2O | 60 % | [42] |
| 5-[-(2-hydroxybenzylidene)amino]-2,3-diphenylpyrimidin-4(3*H*)-one (**DPSA**) | 564 | 365 | 1 mM | CH3CN/H2O | 90 % | [43] |
| 2-(4-(4-(diphenylamino)styryl)pyridin-1(*2H*)-yl)ethanol **(TPA-1OH)** | 658 | 405 | 30 μM | EA/H2O | 99 % | [44] |
| 3,3′-((2-(4-(1,2-diphenyl-2-(p-tolyl)vinyl)phenyl)-7-(7-methylbenzo[c][1,2,5]thiadiazol-4-yl)-*9H*-fluorene-9,9-  diyl)bis(hexane-6,1-diyl))bis(1-methyl-*1H*-imidazol-3-ium) bromide (**PFTPEBT-MI).** | 555 and 565 | 365 | 33 μM | THF/H2O | 90 % | [45] |
| Carbazole linked anthranyl phosphonate **(CBZP)** | 526 | 365 | 1x10-5 M | CH3CN/H2O | 70 %, 50 % | [46] |
| 2-(1-(3,5-bis(trifluoromethyl)phenyl)-4,5-diphenyl-*1H*-imidazol-2-yl) phenol **(IMD)** | 452 | 365 | 1x10-5 M | THF/H2O | 60 % | [47] |
| Hexaphenylsilole **(HPS)** | - | 365 | 1x10-6 M | THF/H2O | 90 % | [48] |
| 1,1,2,3,4,5-Hexaphenylsilole **(HPS)** and1-methyl-1-(4-carboxystyrene)-2,3,4,5-Tetraphenylsilole (**MCSTPS)** | - | 365 | 0.1346 g/L and 0.1366  g/L | Ethanol/H2O | 60 % and  60 % | [49] |
| 2-[1-(*9H*-fluoren)-4,5-diphenyl-*1H*-imidazol-zyl **(FDIP)** | 450 | 365 | 1x10-5 M | Ethanol/H2O | 70 % | Present work |

Table S2. Crystal data and structure refinement of the prepared FDIP molecule.

| **Parameters** | **Data** |
| --- | --- |
| Empirical formula | C34 H24 N2 O |
| Formula weight | 476.55 |
| Temperature | 296(2) K |
| Wavelength | 0.71073 Å |
| Crystal system | Monoclinic |
| space group | P 21/c |
| Unit cell dimensions | a = 14.1603(10) Å  b = 12.6008(8) Å  c = 15.1646(10) Å |
| α | 90 deg. |
| β | 114.591(2) deg. |
| γ | 90 deg. |
| Volume | 2460.4(3) A3 |
| Z, Calculated density | 4, 1.286 Mg/m3 |
| Absorption coefficient | 0.078 mm-1 |
| F(000) | 1000 |
| Crystal size | 0.180 x 0.150 x 0.140 mm |
| Theta range for data collection | 1.582 - 30.690 deg. |
| Limiting indices | -20<=h<=20, -18<=k<=18, -21<=l<=21 |
| Reflections collected / unique | 42107 / 7585 [R(int.) = 0.0410] |
| Completeness to theta = 25.242˚ | 100.0 % |
| Refinement method | Full-matrix least-squares on F2 |
| Data / restraints / parameters | 7585 / 0 / 335 |
| Goodness-of-fit on F2 | 2.363 |
| Final R indices [I>2sigma(I)] | R1 = 0.1431, wR2 = 0.4004 |
| R indices (all data) | R1 = 0.1919, wR2 = 0.4225 |
| Extinction coefficient | n/a |
| Largest diff. peak and hole | 2.516 and -0.697 e. Å-3 |
